# Supplementary material
Source: publisher figshare collection journal article supplement (https://asha.figshare.com/articles/dataset/_/21256341)

## Supplemental Material S2. Histograms of psycholinguistic variables.

### Histograms of Psycholinguistic Variables

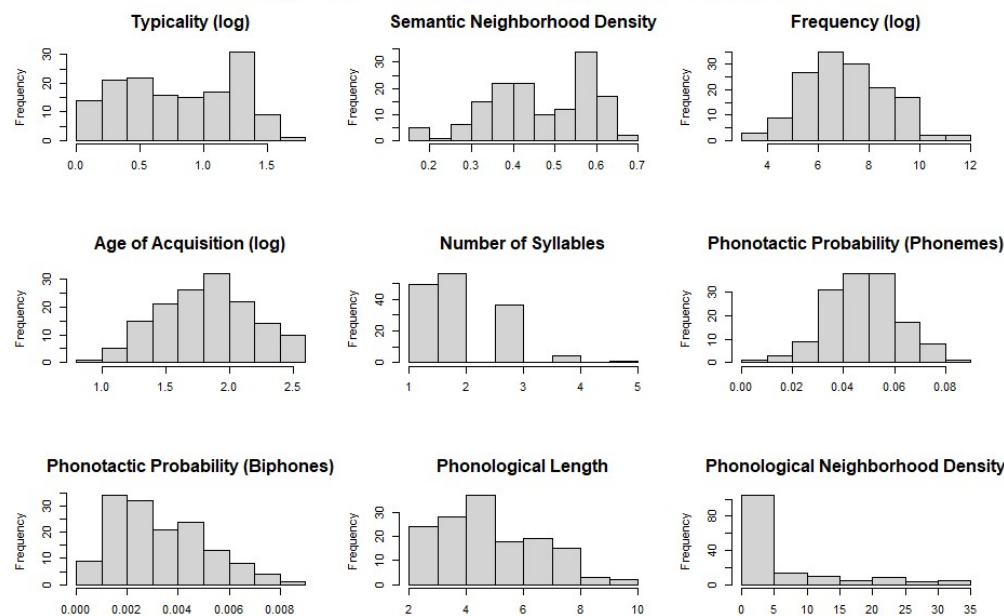

Supplement: Supplementary file 1 [file 1]
