# Supplementary material
Source: publisher figshare collection journal article supplement (https://asha.figshare.com/articles/dataset/_/21256341)
Supplement: Supplementary file 2 [file 1]

**Supplemental Material S1.** References: R packages.

**broom:** David Robinson, Alex Hayes, and Simon Couch. (2021). *broom: Convert Statistical Objects into Tidy Tibbles*. R package version 0.7.6. <https://CRAN.R-project.org/package=broom>

**dplyr:** Hadley Wickham, Romain François, Lionel Henry, and Kirill Müller. (2021). *dplyr: A Grammar of Data Manipulation*. R package version 1.0.7. <https://CRAN.R-project.org/package=dplyr>

**effects:** John Fox and Sanford Weisberg. (2019). *An R Companion to Applied Regression, 3rd Edition*. Thousand Oaks, CA. <https://socialsciences.mcmaster.ca/jfox/Books/Companion/index.html>

**emmeans:** Russell V. Length. (2021). *emmeans: Estimated Marginal Means, aka Least-Squares Means*. R package version 1.6.0. <https://CRAN.R-project.org/package=emmeans>

**ggplot2:** H. Wickham. (2016). *ggplot2: Elegant Graphics for Data Analysis*. Springer-Verlag, New York.

**gridExtra:** Baptiste Auguie. (2017). *gridExtra: Miscellaneous Functions for "Grid" Graphics*. R package version 2.3. <https://CRAN.R-project.org/package=gridExtra>

**lattice:** Sarkar, Deepayan. (2008). *Lattice: Multivariate Data Visualization with R*. Springer, New York. ISBN 978-0-387-75968-5

**lmerTest:** Kuznetsova, A., Brockhoff, P. B., & Christensen, R. H. B. (2017). lmerTest Package: Tests in Linear Mixed Effects Models." *Journal of Statistical Software*, 82(13), 1-26. <https://doi.org/10.18637/jss.v082.i13>

**lme4:** Douglas Bates, Martin Maechler, Ben Bolker, & Steve Walker. (2015). Fitting Linear Mixed-Effects Models Using lme4. *Journal of Statistical Software*, 67(1), 1-48. <https://doi.org/10.18637/jss.v067.i01>

**psych:** Revelle, W. (2020). *psych: Procedures for Personality and Psychological Research, Version 2.0.8*. Northwestern University, Evanston, Illinois. <https://CRAN.R-project.org/package=psych>

**reghelper:** Jeffrey Hughes. (2021). *reghelper: Helper Functions for Regression Analysis*. R package version 1.0.2. <https://CRAN.R-project.org/package=reghelper>

**scales:** Hadley Wickham & Dana Seidel. (2020). *scales: Scale Functions for Visualization*. R package version 1.1.1. <https://CRAN.R-project.org/package=scales>

**tidyverse:** Wickham et al. (2019). Welcome to the tidyverse. *Journal of Open Source Software*, 4(43), 1686, <https://doi.org/10.21105/joss.01686>
