# Supplementary material
Source: publisher figshare collection journal article supplement (https://asha.figshare.com/articles/dataset/_/21256341)
Supplement: Supplementary file 3 [file 1]

**Supplemental Material S4.** Notes about preliminary models including level of education.

**Question 1a:** In a preliminary model including level of education and the interaction between education and the lexical-semantic PCA component, neither of the education-related predictors were significant (education  $p = .655$ ; interaction  $p = .139$ ).

**Question 1b:** In a preliminary model including level of education and the interaction between education and the lexical-semantic PCA component, the interaction between semantic skills and the lexical-semantic component remained significant and neither of the education-related predictors were significant (education  $p = .775$ ; interaction  $p = .153$ ).

**Question 2a (Trained):** In a preliminary model including level of education and the interaction between education and the lexical-semantic PCA component, the interaction between session and the lexical-semantic component remained significant and neither of the education-related predictors were significant (education  $p = .224$ ; interaction  $p = .149$ ).
