# Supplementary material
Source: publisher figshare collection journal article supplement (https://asha.figshare.com/articles/dataset/_/21256341)
Supplement: Supplementary file 4 [file 1]

**Supplemental Material S6.** Model output for follow-up comparisons of slopes.

| <b>Model 2a.1</b> | <b>Level of PCA lexsem</b>         | <b>Session trend</b> | <b>SE</b> | <b>z-ratio</b> | <b>p (vs. 0)<sup>1</sup></b> |
|-------------------|------------------------------------|----------------------|-----------|----------------|------------------------------|
| <b>Trained</b>    | –2                                 | 0.25                 | 0.04      | 6.32           | < .001                       |
| <b>Follow-up</b>  | 2                                  | 0.15                 | 0.04      | 3.92           | < .001                       |
|                   | <b>Contrast</b>                    | <b>Estimate</b>      | <b>SE</b> | <b>z-ratio</b> | <b>p<sup>2</sup></b>         |
|                   | (–2) 2                             | 0.10                 | 0.05      | 2.18           | .03                          |
| <b>Model 2a.2</b> | <b>Level of PCA phono</b>          | <b>Session trend</b> | <b>SE</b> | <b>z-ratio</b> | <b>p (vs. 0)</b>             |
| <b>Trained</b>    | –2                                 | 0.15                 | 0.04      | 3.70           | < .001                       |
| <b>Follow-up</b>  | 2                                  | 0.26                 | 0.04      | 6.62           | < .001                       |
|                   | <b>Contrast</b>                    | <b>Estimate</b>      | <b>SE</b> | <b>z-ratio</b> | <b>p</b>                     |
|                   | (–2) 2                             | –0.12                | 0.04      | –3.03          | .003                         |
| <b>Model 2a.3</b> | <b>Level of PCA phonotactics</b>   | <b>Session trend</b> | <b>SE</b> | <b>z-ratio</b> | <b>p (vs. 0)</b>             |
| <b>Monitored</b>  | –2                                 | 0.06                 | 0.03      | 2.33           | .02                          |
| <b>Follow-up</b>  | 2                                  | –0.03                | 0.03      | –1.09          | .274                         |
|                   | <b>Contrast</b>                    | <b>Estimate</b>      | <b>SE</b> | <b>z-ratio</b> | <b>p</b>                     |
|                   | (–2) 2                             | 0.09                 | 0.05      | 2.06           | .04                          |
| <b>Model 2b.1</b> | <b>Level of Semantic Score</b>     | <b>Session trend</b> | <b>SE</b> | <b>z-ratio</b> | <b>p (vs. 0)</b>             |
| <b>Trained</b>    | mean – 1 SD                        | 0.12                 | 0.04      | 3.07           | .002                         |
| <b>Follow-up</b>  | mean + 1 SD                        | 0.29                 | 0.04      | 7.00           | < .001                       |
|                   | <b>Contrast</b>                    | <b>Estimate</b>      | <b>SE</b> | <b>z-ratio</b> | <b>p</b>                     |
|                   | (–1 SD) (+1 SD)                    | –0.17                | 0.06      | –3.13          | .002                         |
| <b>Model 2b.2</b> | <b>Level of Phonological Score</b> | <b>Session trend</b> | <b>SE</b> | <b>z-ratio</b> | <b>p (vs. 0)</b>             |
| <b>Trained</b>    | mean – 1 SD                        | 0.08                 | 0.03      | 2.63           | .009                         |
| <b>Follow-up</b>  | mean + 1 SD                        | 0.34                 | 0.04      | 9.24           | < .001                       |
|                   | <b>Contrast</b>                    | <b>Estimate</b>      | <b>SE</b> | <b>z-ratio</b> | <b>p</b>                     |
|                   | (–1 SD) (+1 SD)                    | –0.26                | 0.05      | –5.32          | < .001                       |
| <b>Model 2b.2</b> | <b>Level of Phonological Score</b> | <b>Session trend</b> | <b>SE</b> | <b>z-ratio</b> | <b>p (vs. 0)</b>             |
| <b>Monitored</b>  | mean – 1 SD                        | –0.04                | 0.02      | –1.97          | .049                         |
| <b>Follow-up</b>  | mean + 1 SD                        | 0.10                 | 0.03      | 3.88           | < .001                       |
|                   | <b>Contrast</b>                    | <b>Estimate</b>      | <b>SE</b> | <b>z-ratio</b> | <b>p</b>                     |
|                   | (–1 SD) (+1 SD)                    | –0.14                | 0.04      | –3.69          | < .001                       |

<sup>1</sup>p-value signifies whether trend line is significantly different than 0

<sup>2</sup>p-value signifies whether trend lines are significantly different from each other
