# Supplementary material
Source: publisher figshare collection journal article supplement (https://asha.figshare.com/articles/dataset/_/21256341)
Supplement: Supplementary file 5 [file 1]

**Supplemental Material S3.** Correlation matrix for psycholinguistic variables.

|            | Typicality | SND  | Frequency | AOA  | Syllables | PPphon | PPbiphon | Phonemes | PND  |
|------------|------------|------|-----------|------|-----------|--------|----------|----------|------|
| Typicality | 1.00       | -.20 | -.23      | .34  | -.01      | -.05   | -.02     | .09      | .03  |
| SND        | -.20       | 1.00 | .85       | -.42 | -.37      | .14    | .08      | -.46     | .37  |
| Frequency  | -.23       | .85  | 1.00      | -.61 | -.43      | .17    | .06      | -.52     | .45  |
| AOA        | .34        | -.42 | -.61      | 1.00 | .20       | -.13   | -.07     | .25      | -.30 |
| Syllables  | -.01       | -.37 | -.43      | .20  | 1.00      | -.06   | .14      | .84      | -.63 |
| PPphon     | -.05       | .14  | .17       | -.13 | -.06      | 1.00   | .68      | -.04     | .14  |
| PPbiphon   | -.02       | .08  | .06       | -.07 | .14       | .68    | 1.00     | .23      | -.15 |
| Phonemes   | .09        | -.46 | -.52      | .25  | .84       | -.04   | .23      | 1.00     | -.70 |
| PND        | .03        | .37  | .45       | -.30 | -.63      | .14    | -.15     | -.70     | 1.00 |

Typicality: continuous; log-transformed

SND (semantic neighborhood density)

Frequency: log-transformed

AOA (age of acquisition): log-transformed

Syllables: number of syllables

PPphon (phonotactic probability of phonemes)

PPbiphon (phonotactic probability of biphones)

Phonemes: number of phonemes

PND (phonological neighborhood density)
