# Supplementary material
Source: publisher figshare collection journal article supplement (https://asha.figshare.com/articles/dataset/_/21256341)
Supplement: Supplementary file 6 [file 1]

**Supplemental Material S5.** Model output for primary research questions.

| <b>Model 1a</b>   | <b>Fixed Effects</b>        | <b>Estimate</b> | <b>SE</b> | <b>z-value</b> | <b>p</b> |
|-------------------|-----------------------------|-----------------|-----------|----------------|----------|
|                   | (Intercept)                 | −1.31           | 0.20      | −6.66          | < .001   |
|                   | PCAphono                    | 0.38            | 0.11      | 3.56           | < .001   |
|                   | PCAphonotactics             | 0.02            | 0.10      | 0.17           | .867     |
|                   | PCAlexsem                   | 1.05            | 0.11      | 9.97           | < .001   |
|                   | AQ1                         | 2.19            | 0.19      | 11.55          | < .001   |
|                   | Category1                   | −1.25           | 0.20      | −6.40          | < .001   |
|                   | Category2                   | 0.50            | 0.21      | 2.40           | .016     |
|                   | Category3                   | −0.05           | 0.21      | −0.26          | .797     |
|                   | Category4                   | 0.73            | 0.22      | 3.38           | < .001   |
|                   | <b>Random Effects</b>       | <b>Variance</b> | <b>SD</b> |                |          |
|                   | Item (Intercept)            | 1.20            | 1.09      |                |          |
|                   | ID (Intercept)              | 0.88            | 0.94      |                |          |
| <b>Model 1b.1</b> | <b>Fixed Effects</b>        | <b>Estimate</b> | <b>SE</b> | <b>z-value</b> | <b>p</b> |
|                   | (Intercept)                 | −1.34           | 0.20      | −6.81          | < .001   |
|                   | PCAlexsem                   | 1.00            | 0.13      | 7.71           | < .001   |
|                   | semscores                   | 0.46            | 0.21      | 2.15           | .032     |
|                   | AQ1                         | 1.83            | 0.22      | 8.31           | < .001   |
|                   | PCAlexsem:semscores         | 0.19            | 0.07      | 2.77           | .006     |
|                   | <b>Random Effects</b>       | <b>Variance</b> | <b>SD</b> |                |          |
|                   | Item (Intercept)            | 1.96            | 1.40      |                |          |
|                   | ID (Intercept)              | 0.71            | 0.84      |                |          |
| <b>Model 1b.2</b> | <b>Fixed Effects</b>        | <b>Estimate</b> | <b>SE</b> | <b>z-value</b> | <b>p</b> |
|                   | (Intercept)                 | −1.39           | 0.22      | −6.19          | < .001   |
|                   | PCAphono                    | 0.47            | 0.15      | 3.15           | .002     |
|                   | phonoscores                 | 0.10            | 0.24      | 0.40           | .692     |
|                   | AQ1                         | 2.11            | 0.25      | 8.37           | < .001   |
|                   | PCAphono:phonoscores        | 0.01            | 0.05      | 0.21           | .832     |
|                   | <b>Random Effects</b>       | <b>Variance</b> | <b>SD</b> |                |          |
|                   | Item (Intercept)            | 2.90            | 1.70      |                |          |
|                   | ID (Intercept)              | 0.87            | 0.93      |                |          |
| <b>Model 1b.3</b> | <b>Fixed Effects</b>        | <b>Estimate</b> | <b>SE</b> | <b>z-value</b> | <b>p</b> |
|                   | (Intercept)                 | −1.40           | 0.23      | −6.13          | < .001   |
|                   | PCAphonotactics             | 0.15            | 0.15      | 0.99           | .320     |
|                   | phonoscores                 | 0.10            | 0.24      | 0.41           | .681     |
|                   | AQ1                         | 2.11            | 0.25      | 8.38           | < .001   |
|                   | PCAphonotactics:phonoscores | −0.10           | 0.05      | −1.92          | .055     |
|                   | <b>Random Effects</b>       | <b>Variance</b> | <b>SD</b> |                |          |
|                   | Item (Intercept)            | 3.16            | 1.78      |                |          |
|                   | ID (Intercept)              | 0.87            | 0.93      |                |          |

| <b>Model 2a.1</b> | <b>Fixed Effects</b>  | <b>Estimate</b> | <b>SE</b> | <b>z-value</b> | <b>p</b> |
|-------------------|-----------------------|-----------------|-----------|----------------|----------|
| <b>Trained</b>    | (Intercept)           | −0.59           | 0.31      | −1.90          | .057     |
|                   | PCAlexsem             | 0.54            | 0.16      | 3.34           | < .001   |
|                   | Session               | 0.20            | 0.03      | 6.32           | < .001   |
|                   | AQ1                   | 1.40            | 0.23      | 6.19           | < .001   |
|                   | PCAlexsem:Session     | −0.03           | 0.01      | −2.18          | .030     |
|                   | <b>Random Effects</b> | <b>Variance</b> | <b>SD</b> |                |          |
|                   | Item (Intercept)      | 2.01            | 1.42      |                |          |
|                   | ID (Intercept)        | 2.21            | 1.49      |                |          |
|                   | Session ID (Slope)    | 0.03            | 0.16      |                |          |
|                   |                       |                 |           |                |          |
| <b>Model 2a.1</b> | <b>Fixed Effects</b>  | <b>Estimate</b> | <b>SE</b> | <b>z-value</b> | <b>p</b> |
| <b>Monitored</b>  | (Intercept)           | −0.91           | 0.36      | −2.53          | .011     |
|                   | PCAlexsem             | 1.18            | 0.20      | 5.83           | < .001   |
|                   | Session               | 0.02            | 0.02      | 1.11           | .266     |
|                   | AQ1                   | 3.33            | 0.35      | 9.50           | < .001   |
|                   | PCAlexsem:Session     | −0.01           | 0.01      | −0.55          | .580     |
|                   | <b>Random Effects</b> | <b>Variance</b> | <b>SD</b> |                |          |
|                   | Item (Intercept)      | 3.27            | 1.81      |                |          |
|                   | ID (Intercept)        | 2.65            | 1.63      |                |          |
|                   | Session ID (Slope)    | 0.002           | 0.04      |                |          |
|                   |                       |                 |           |                |          |
| <b>Model 2a.2</b> | <b>Fixed Effects</b>  | <b>Estimate</b> | <b>SE</b> | <b>z-value</b> | <b>p</b> |
| <b>Trained</b>    | (Intercept)           | −0.61           | 0.30      | −2.02          | .044     |
|                   | PCAphono              | 0.52            | 0.14      | 3.83           | < .001   |
|                   | Session               | 0.20            | 0.03      | 5.91           | < .001   |
|                   | AQ1                   | 1.28            | 0.22      | 5.75           | < .001   |
|                   | PCAphono:Session      | 0.03            | 0.01      | 3.03           | .002     |
|                   | <b>Random Effects</b> | <b>Variance</b> | <b>SD</b> |                |          |
|                   | Item (Intercept)      | 1.72            | 1.31      |                |          |
|                   | ID (Intercept)        | 2.21            | 1.48      |                |          |
|                   | Session ID (Slope)    | 0.03            | 0.17      |                |          |
|                   |                       |                 |           |                |          |
| <b>Model 2a.2</b> | <b>Fixed Effects</b>  | <b>Estimate</b> | <b>SE</b> | <b>z-value</b> | <b>p</b> |
| <b>Monitored</b>  | (Intercept)           | −0.94           | 0.37      | −2.53          | .012     |
|                   | PCAphono              | 0.52            | 0.21      | 2.41           | .016     |
|                   | Session               | 0.02            | 0.02      | 1.21           | .225     |
|                   | AQ1                   | 3.34            | 0.35      | 9.51           | < .001   |
|                   | PCAphono:Session      | −0.01           | 0.01      | −1.15          | .248     |
|                   | <b>Random Effects</b> | <b>Variance</b> | <b>SD</b> |                |          |
|                   | Item (Intercept)      | 4.25            | 2.06      |                |          |
|                   | ID (Intercept)        | 2.60            | 1.61      |                |          |
|                   | Session ID (Slope)    | 0.002           | 0.04      |                |          |
|                   |                       |                 |           |                |          |

|                   |                         |                 |           |                |          |
|-------------------|-------------------------|-----------------|-----------|----------------|----------|
| <b>Model 2a.3</b> | <b>Fixed Effects</b>    | <b>Estimate</b> | <b>SE</b> | <b>z-value</b> | <b>p</b> |
| <b>Trained</b>    | (Intercept)             | −0.58           | 0.31      | −1.86          | .063     |
|                   | PCAphonotactics         | 0.20            | 0.14      | 1.39           | .163     |
|                   | Session                 | 0.20            | 0.03      | 6.04           | < .001   |
|                   | AQ1                     | 1.40            | 0.24      | 5.90           | < .001   |
|                   | PCAphonotactics:Session | −0.002          | 0.01      | −0.24          | .814     |
|                   | <b>Random Effects</b>   | <b>Variance</b> | <b>SD</b> |                |          |
|                   | Item (Intercept)        | 2.13            | 1.46      |                |          |
|                   | ID (Intercept)          | 2.24            | 1.50      |                |          |
|                   | Session   ID (Slope)    | 0.03            | 0.17      |                |          |
| <b>Model 2a.3</b> | <b>Fixed Effects</b>    | <b>Estimate</b> | <b>SE</b> | <b>z-value</b> | <b>p</b> |
| <b>Monitored</b>  | (Intercept)             | −0.88           | 0.37      | −2.37          | .018     |
|                   | PCAphonotactics         | 0.24            | 0.21      | 1.18           | .240     |
|                   | Session                 | 0.02            | 0.02      | 1.11           | .266     |
|                   | AQ1                     | 3.34            | 0.35      | 9.48           | < .001   |
|                   | PCAphonotactics:Session | −0.02           | 0.01      | −2.06          | .040     |
|                   | <b>Random Effects</b>   | <b>Variance</b> | <b>SD</b> |                |          |
|                   | Item (Intercept)        | 4.40            | 2.10      |                |          |
|                   | ID (Intercept)          | 2.62            | 1.62      |                |          |
|                   | Session   ID (Slope)    | 0.002           | 0.04      |                |          |
| <b>Model 2b.1</b> | <b>Fixed Effects</b>    | <b>Estimate</b> | <b>SE</b> | <b>z-value</b> | <b>p</b> |
| <b>Trained</b>    | (Intercept)             | −0.56           | 0.28      | −2.00          | .046     |
|                   | semscores               | 0.89            | 0.30      | 3.03           | .002     |
|                   | Session                 | 0.20            | 0.03      | 7.16           | < .001   |
|                   | AQ1                     | 1.15            | 0.28      | 4.12           | < .001   |
|                   | semscores:Session       | 0.09            | 0.03      | 3.13           | .002     |
|                   | <b>Random Effects</b>   | <b>Variance</b> | <b>SD</b> |                |          |
|                   | Item (Intercept)        | 2.17            | 1.47      |                |          |
|                   | ID (Intercept)          | 1.66            | 1.29      |                |          |
|                   | Session   ID (Slope)    | 0.02            | 0.14      |                |          |
| <b>Model 2b.1</b> | <b>Fixed Effects</b>    | <b>Estimate</b> | <b>SE</b> | <b>z-value</b> | <b>p</b> |
| <b>Monitored</b>  | (Intercept)             | −0.87           | 0.36      | −2.42          | .016     |
|                   | semscores               | 0.47            | 0.39      | 1.19           | .232     |
|                   | Session                 | 0.01            | 0.02      | 0.78           | .434     |
|                   | AQ1                     | 2.96            | 0.42      | 7.12           | < .001   |
|                   | semscores:Session       | 0.03            | 0.02      | 1.42           | .156     |
|                   | <b>Random Effects</b>   | <b>Variance</b> | <b>SD</b> |                |          |
|                   | Item (Intercept)        | 4.39            | 2.10      |                |          |
|                   | ID (Intercept)          | 2.37            | 1.54      |                |          |
|                   | Session   ID (Slope)    | 0.002           | 0.04      |                |          |

| <b>Model 2b.2</b> | <b>Fixed Effects</b>  | <b>Estimate</b> | <b>SE</b> | <b>z-value</b> | <b>p</b> |
|-------------------|-----------------------|-----------------|-----------|----------------|----------|
| <b>Trained</b>    | (Intercept)           | −0.49           | 0.29      | −1.66          | .098     |
|                   | phonoscores           | 0.60            | 0.32      | 1.89           | .059     |
|                   | Session               | 0.21            | 0.02      | 9.29           | < .001   |
|                   | AQ1                   | 1.43            | 0.28      | 5.13           | < .001   |
|                   | phonoscores:Session   | 0.13            | 0.02      | 5.32           | < .001   |
|                   | <b>Random Effects</b> | <b>Variance</b> | <b>SD</b> |                |          |
|                   | Item (Intercept)      | 2.16            | 1.47      |                |          |
|                   | ID (Intercept)        | 1.89            | 1.37      |                |          |
|                   | Session   ID (Slope)  | 0.01            | 0.10      |                |          |
|                   |                       |                 |           |                |          |
| <b>Model 2b.2</b> | <b>Fixed Effects</b>  | <b>Estimate</b> | <b>SE</b> | <b>z-value</b> | <b>p</b> |
| <b>Monitored</b>  | (Intercept)           | −0.88           | 0.36      | −2.42          | .015     |
|                   | phonoscores           | 0.20            | 0.42      | 0.48           | .628     |
|                   | Session               | 0.03            | 0.01      | 2.36           | .018     |
|                   | AQ1                   | 3.13            | 0.42      | 7.46           | < .001   |
|                   | phonoscores:Session   | 0.07            | 0.02      | 3.69           | < .001   |
|                   | <b>Random Effects</b> | <b>Variance</b> | <b>SD</b> |                |          |
|                   | Item (Intercept)      | 4.40            | 2.10      |                |          |
|                   | ID (Intercept)        | 2.42            | 1.56      |                |          |
|                   | Session   ID (Slope)  | < 0.001         | 0.02      |                |          |
|                   |                       |                 |           |                |          |
